# Supplementary material for: Effect of Proteinuria and Glomerular Filtration Rate on Renal Outcome in Patients with Biopsy-Proven Benign Nephrosclerosis
Source: PLOS journal article supplement (doi:10.1371/journal.pone.0147690), 2016-01-25
Supplement: S2 (10.1371/journal.pone.0147690.s002) [file journal.pone.0147690.s002]

**S1 Table.** Multivariate-adjusted subhazard ratios for renal events after additional adjustment for laboratory data with imputation.

|                                                     | Multivariable-<br>Adjusted | <i>P</i> |
|-----------------------------------------------------|----------------------------|----------|
|                                                     | SHR (95% CI)               |          |
| Baseline eGFR (per -10 mL/min/1.73 m <sup>2</sup> ) | 1.30 (1.02–1.66)           | 0.033    |
| Baseline proteinuria (per 1 g/day)                  | 1.50 (1.21–1.87)           | <0.001   |
| Age (per 10 years)                                  | 0.95 (0.73–1.23)           | 0.69     |
| Male sex                                            | 1.58 (0.64–3.92)           | 0.32     |
| Body mass index (per 1 kg/m <sup>2</sup> )          | 0.89 (0.80–1.00)           | 0.055    |
| Systolic BP (per 10 mmHg)                           | 1.03 (0.88–1.21)           | 0.67     |
| Smoking                                             | 1.48 (0.66–3.32)           | 0.34     |
| Pre-existing CVD                                    | 0.40 (0.13–1.20)           | 0.10     |
| Serum albumin (per -1 g/dL)                         | 2.10 (1.22–3.61)           | 0.007    |
| Serum uric acid (per 1 mg/dL)                       | 1.04 (0.83–1.30)           | 0.73     |
| C-Reactive protein (per 1 mg/dL)                    | 0.84 (0.62–1.15)           | 0.28     |
| Hemoglobin (per 1 g/dL)                             | 1.16 (0.99–1.36)           | 0.075    |
| HbA1c (per 1 %)                                     | 0.86 (0.57–1.30)           | 0.47     |
| Total cholesterol (per 10 mg/dL)                    | 1.04 (0.93–1.15)           | 0.37     |
| ACEIs/ARBs use                                      | 1.29 (0.72–2.30)           | 0.37     |

Note: Data were adjusted for baseline covariates, includes eGFR, proteinuria, age, sex, body mass index, systolic blood pressure, smoking history, past history of CVD, serum albumin, serum uric acid, C-reactive protein, hemoglobin, HbA1c, total cholesterol, and ACEIs/ARBs use.

Abbreviations: eGFR, estimated glomerular filtration rate; SHR, subhazard ratio; CI, confidence interval; BP, blood pressure; CVD, cardiovascular disease; ACEIs, angiotensin-converting enzyme inhibitors; ARBs, angiotensin receptor blockers.
